# Supplementary material
Source: Springer Nature journal article supplement (https://www.springermedizin.de/resource/supplementary/13048_2013_150_MOESM1_ESM.pdf/9664998)

**A**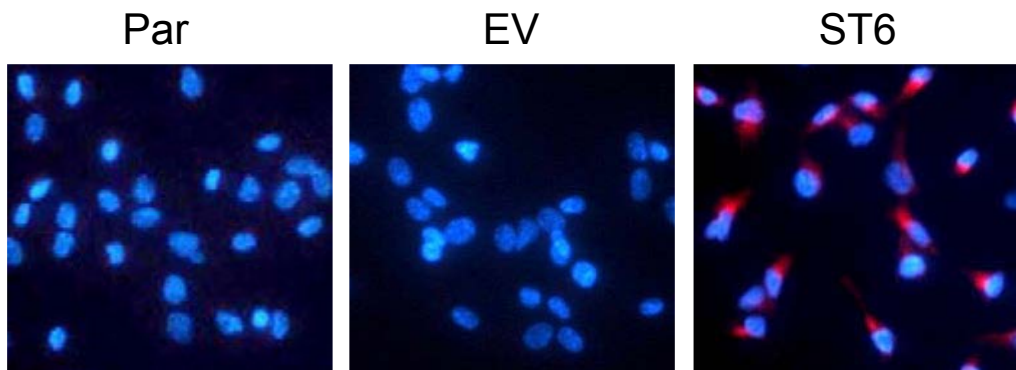**B**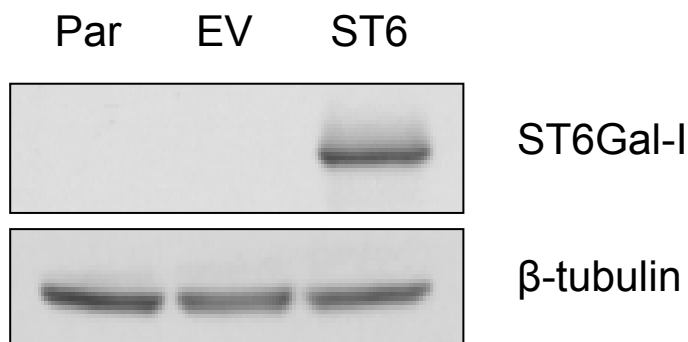**C**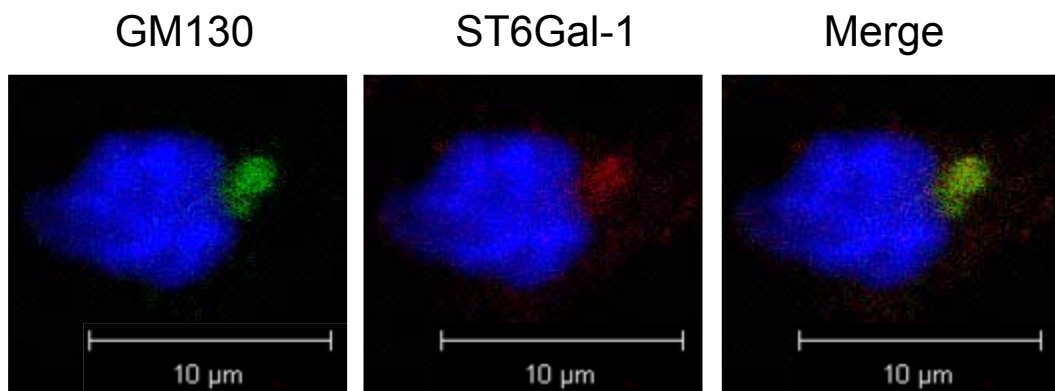

Supplement: MOESM1 [file 9664998]
